# Supplementary material for: TMB12: a newly designed 2D transition-metal boride for spintronics and electrochemical catalyst applications
Source: Royal Society of Chemistry journal article supplement (doi:10.1039/d2nr06461h), 2022-12-26
Supplement: d2nr06461h1.pdf [file d2nr06461h1.pdf]

## Supporting Information for

### TMB<sub>12</sub>: A Newly Designed 2D Transition-Metal Borides for Spintronics and Electrochemical Catalyst Applications

Feng Wu,<sup>a//</sup> Xiaojing Yao,<sup>b//</sup> Yujie Liu,<sup>c</sup> Xiangfei Zhu,<sup>c</sup> Jinlian Lu,<sup>a</sup> Wenqi Zhou,<sup>c</sup> Xiuyun Zhang<sup>c\*</sup>

<sup>a</sup>Department of Physics, Yancheng Institute of Technology, Yancheng, Jiangsu 224051, China.

<sup>b</sup>College of Physics and Hebei Advanced Thin Films Laboratory, Hebei Normal University, Shijiazhuang 050024, China.

<sup>c</sup>College of Physics Science and Technology & Microelectronics Industry Research Institute, Yangzhou University, Yangzhou 225002, China. E-mail: [xyzhang@yzu.edu.cn](mailto:xyzhang@yzu.edu.cn)

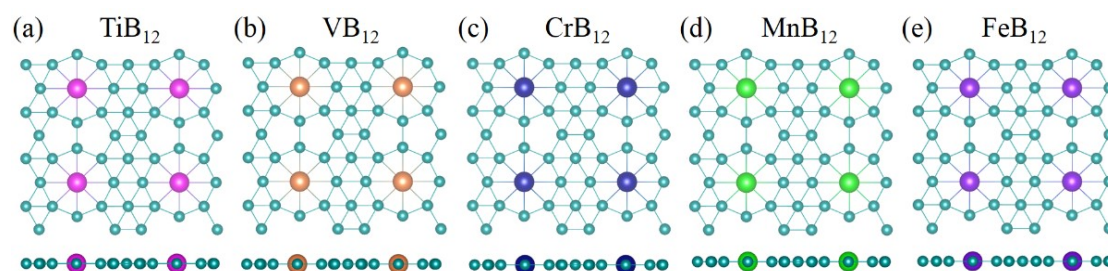

**Fig. S1** The optimized structures of TMB<sub>12</sub>(TM=Ti, V, Cr, Mn, and Fe) monolayer. The magenta, orange, dark-blue, green, purple and teal balls represent Ti, V, Cr, Mn, Fe and B atoms, respectively.

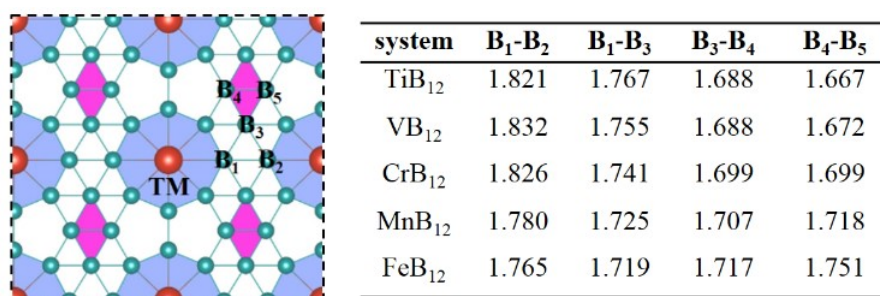

**Fig. S2** The lengths (Å) of party of the B-B bonds in the TMB<sub>12</sub> structure.

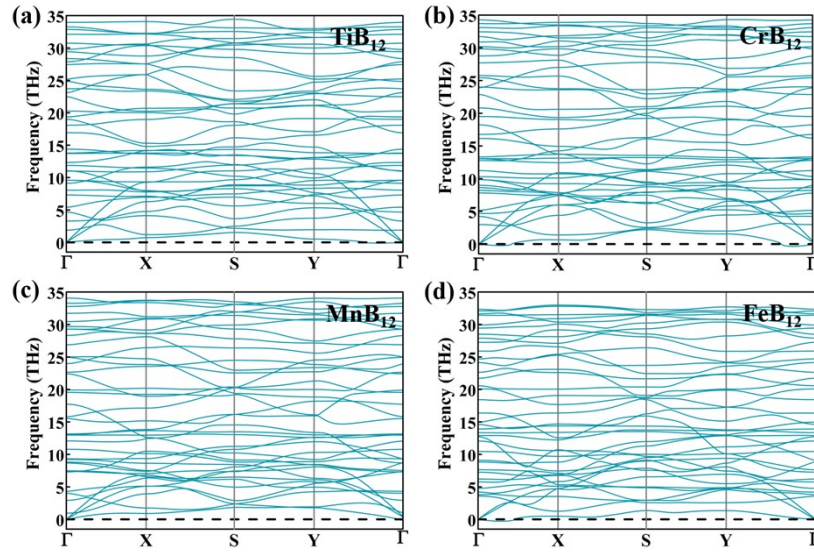

**Fig. S3** The phonon spectrum of (a)  $\text{TiB}_{12}$ ; (b)  $\text{CrB}_{12}$ ; (c)  $\text{MnB}_{12}$ ; and (d)  $\text{FeB}_{12}$  monolayer.

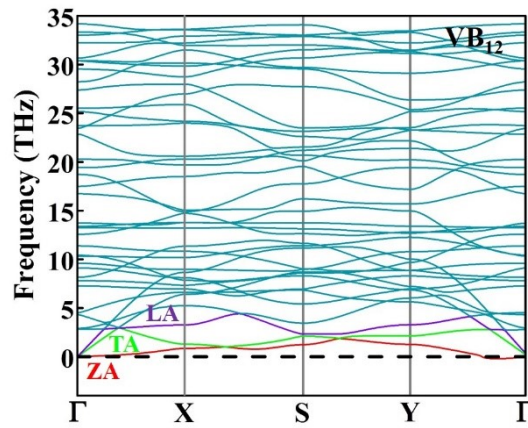

**Fig. S4** The phonon spectrum of the  $\text{VB}_{12}$  monolayer.

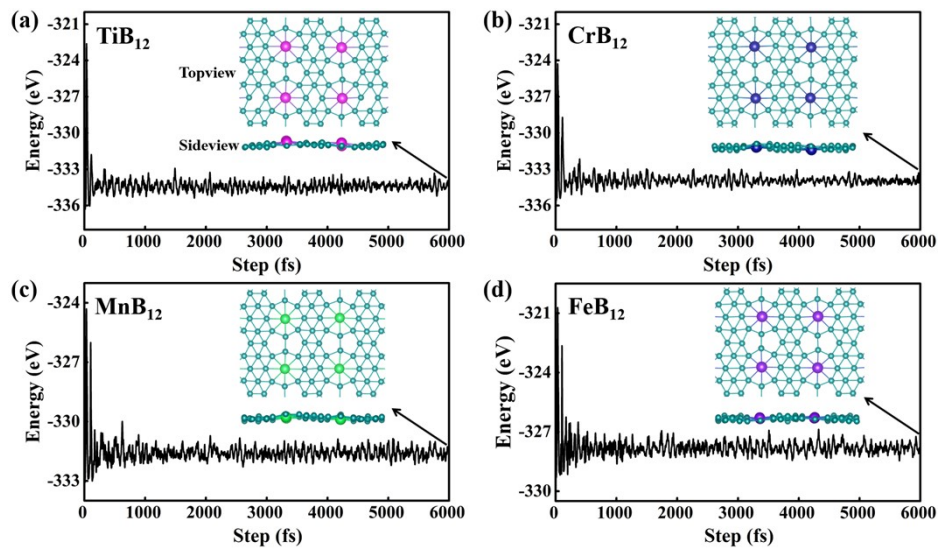

**Fig. S5** AIMD simulation of (a)  $\text{TiB}_{12}$ ; (b)  $\text{CrB}_{12}$ ; (c)  $\text{MnB}_{12}$ ; and (d)  $\text{FeB}_{12}$  monolayer at 300 K for 6 ps.

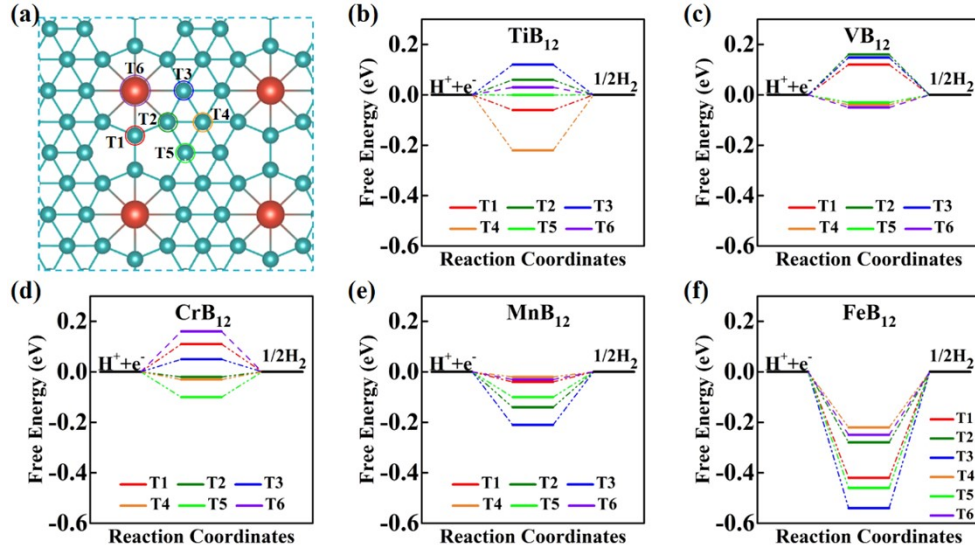

**Fig. S6** (a) Illustration of six different hydrogen adsorption sites on  $\text{TMB}_{12}$  monolayer. (b-f) The Gibbs free energy of six hydrogen adsorption sites for  $\text{TMB}_{12}$  (TM = Ti, V, Cr, Mn and Fe) monolayer.

**Table S1** Calculated elastic constants  $C$  (in kbar) of  $\text{TMB}_{12}$ .

| system            | $C_{11}$ | $C_{22}$ | $C_{12}$ | $C_{66}$ |
|-------------------|----------|----------|----------|----------|
| $\text{TiB}_{12}$ | 1070.2   | 1335.0   | 291.40   | 501.8    |
| $\text{VB}_{12}$  | 1122.8   | 1306.6   | 273.1    | 447.0    |
| $\text{CrB}_{12}$ | 984.3    | 1268.8   | 213.3    | 477.0    |
| $\text{MnB}_{12}$ | 981.1    | 1233.3   | 234.6    | 467.1    |
| $\text{FeB}_{12}$ | 398.9    | 1190.8   | 119.9    | 438.1    |

**Table S2.** Calculated MAEs along different magnetic directions, the easy axis, and magnetic exchange parameters ( $J_1$  and  $J_2$ ) for  $\text{TMB}_{12}$  (TM = V, Cr, Mn, Fe).

| system            | 100 (eV)   | 010 (eV)   | 001 (eV)   | MAE<br>( $\mu\text{eV}$ ) | Easy<br>axis | $J_1$<br>(meV) | $J_2$<br>(meV) |
|-------------------|------------|------------|------------|---------------------------|--------------|----------------|----------------|
| $\text{VB}_{12}$  | -80.749029 | -80.749101 | -80.749044 | 72                        | (010)        | 25.0           | 63.7           |
| $\text{CrB}_{12}$ | -80.957244 | -80.957053 | -80.957476 | 423                       | (001)        | 27.2           | 22.0           |
| $\text{MnB}_{12}$ | -81.129102 | -81.129002 | -81.129625 | 623                       | (001)        | 10.4           | -27.1          |
| $\text{FeB}_{12}$ | -80.157135 | -80.157092 | -80.157290 | 198                       | (001)        | -7.83          | -14.4          |
